# Supplementary material for: Ab initio investigation of the ground and excited states of MoO+,2+,− and their catalytic strength on water activation
Source: Royal Society of Chemistry journal article supplement (doi:10.1039/c8cp01676c), 2018-01-01
Supplement: c8cp01676c1.pdf [file c8cp01676c1.pdf]

## Supporting Information

### **Ab initio investigation of the ground and excited states of $\text{MoO}^{+,2+,,-}$ and their catalytic strength on water activation**

Isuru R. Ariyaratna and Evangelos Miliordos\*

Department of Chemistry and Biochemistry, Auburn University, Auburn, AL 36849

\* To whom correspondence should be addressed. E-mail: [emiliord@auburn.edu](mailto:emiliord@auburn.edu)

**Figure S1.** MRCI PECs of  $\text{MoO}^{2+}$  with respect to the Mo-O distance in the range 1.0 to 30.0 Å. The  $^3\text{X}$  states can be one of  $^3\text{P}$ ,  $^3\text{H}$ ,  $^3\text{F}$ , or  $^3\text{G}$ .

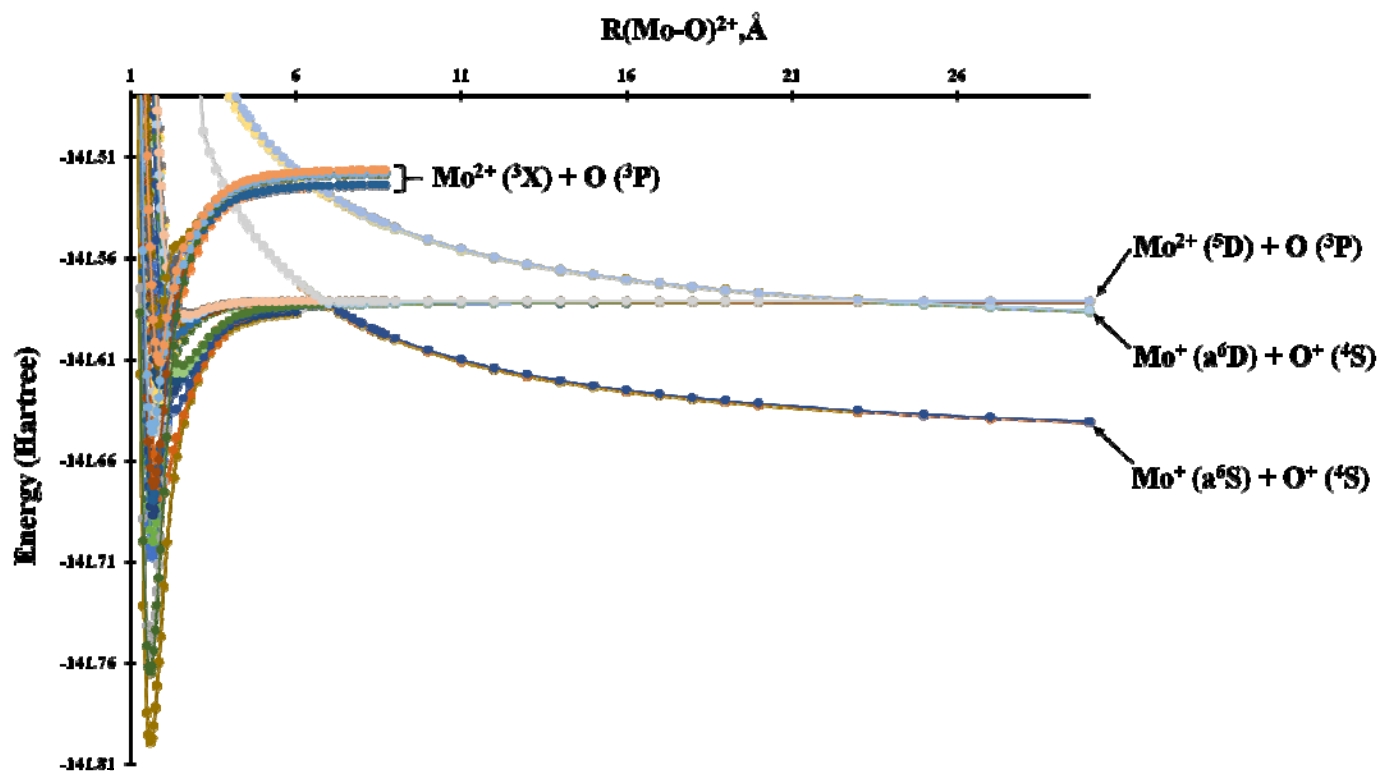

**Table S1.** Optimal geometries for MoO<sup>+2+,-</sup> (MoO distance in Å) water-MoO<sup>+2+,-</sup> interacting complex (reactants), transition states (TS), and products (HOMoOH<sup>+2+,-</sup>) at the MRCI/triple- $\zeta$  (see text) level of theory (Cartesian coordinates in Å) for the lowest electronic states.

| Species                                                              | MoO   | Reactants |               |               | TS            |    |               | Product       |               |    |               |               |               |
|----------------------------------------------------------------------|-------|-----------|---------------|---------------|---------------|----|---------------|---------------|---------------|----|---------------|---------------|---------------|
| MoO <sup>+</sup><br>X <sup>4</sup> $\Sigma^-$<br>(1 <sup>4</sup> A)  | 1.613 | Mo        | 0.3081520000  | 0.3259430000  | 0.1232980000  | Mo | 0.4394990000  | -0.1646950000 | -0.0058630000 | Mo | -0.6109610000 | 0.0232790000  | 0.0128640000  |
|                                                                      |       | O         | 1.1500430000  | 1.6901790000  | -0.1467370000 | O  | -0.2943990000 | 1.4081270000  | 0.0194460000  | O  | -0.2037220000 | 1.7694110000  | -0.0920590000 |
|                                                                      |       | O         | -1.7618600000 | -0.4025070000 | 0.1622060000  | O  | -1.5614110000 | -0.4528370000 | -0.0847430000 | O  | -1.5309610000 | -1.5025520000 | 0.2390640000  |
|                                                                      |       | H         | -2.5324340000 | 0.1287890000  | -0.0455010000 | H  | -1.3226490000 | 0.7993570000  | 0.0211120000  | H  | -0.2315160000 | 2.7251200000  | -0.0914410000 |
|                                                                      |       | H         | -2.0768820000 | -1.2810740000 | 0.3827100000  | H  | -2.1422990000 | -0.9096680000 | 0.5176320000  | H  | -2.2091340000 | -2.1553380000 | 0.4066830000  |
| MoO <sup>+</sup><br>a <sup>2</sup> $\Delta$<br>(1 <sup>2</sup> A)    | 1.597 | Mo        | 0.2741890000  | 0.3643750000  | -0.3873540000 | Mo | 0.4377060000  | -0.1647420000 | -0.0104090000 | Mo | -0.9548470000 | 0.1583050000  | 0.0812780000  |
|                                                                      |       | O         | 1.0779680000  | 1.5519050000  | 0.3268080000  | O  | -0.3088910000 | 1.3840030000  | 0.0430720000  | O  | -0.3117860000 | 1.8228770000  | -0.1236440000 |
|                                                                      |       | O         | -1.7501100000 | -0.4125840000 | 0.0385740000  | O  | -1.5552300000 | -0.4633960000 | -0.0996480000 | O  | -1.6060920000 | -1.5027330000 | 0.2890060000  |
|                                                                      |       | H         | -2.5713680000 | -0.0197510000 | -0.2561000000 | H  | -1.3271430000 | 0.8138600000  | 0.0007090000  | H  | 0.0268220000  | 2.7089950000  | -0.2286400000 |
|                                                                      |       | H         | -1.9717630000 | -1.0307060000 | 0.7345110000  | H  | -2.1277010000 | -0.8894430000 | 0.5338600000  | H  | -1.9553890000 | -2.3836320000 | 0.4025590000  |
| MoO <sup>+</sup><br>a <sup>2</sup> $\Delta$<br>(2 <sup>2</sup> A)    | 1.597 | Mo        | 0.3090880000  | 0.3924500000  | 0.0492000000  | Mo | 0.4196090000  | -0.1688780000 | -0.0023140000 | Mo | -0.9546960000 | 0.1582430000  | 0.0812480000  |
|                                                                      |       | O         | 1.2448010000  | 1.6925950000  | -0.0120130000 | O  | -0.3149230000 | 1.3830110000  | 0.0596750000  | O  | -0.3118270000 | 1.8228890000  | -0.1236760000 |
|                                                                      |       | O         | -1.7992330000 | -0.4345050000 | 0.1164730000  | O  | -1.5781490000 | -0.4860260000 | -0.1424130000 | O  | -1.6061300000 | -1.5027200000 | 0.2889950000  |
|                                                                      |       | H         | -2.5646110000 | 0.0524000000  | -0.1899280000 | H  | -1.3144520000 | 0.8261860000  | -0.0084040000 | H  | 0.0267860000  | 2.7090100000  | -0.2285960000 |
|                                                                      |       | H         | -2.1311290000 | -1.2497010000 | 0.4927080000  | H  | -2.0933420000 | -0.8740090000 | 0.5610400000  | H  | -1.9554240000 | -2.3836100000 | 0.4025880000  |
| MoO <sup>+</sup><br>A <sup>4</sup> $\Pi$<br>(1 <sup>4</sup> A)       | 1.656 | Mo        | 0.3081520000  | 0.3259430000  | 0.1232980000  | Mo | 0.4394990000  | -0.1646950000 | -0.0058630000 | Mo | -0.6109610000 | 0.0232790000  | 0.0128640000  |
|                                                                      |       | O         | 1.1500430000  | 1.6901790000  | -0.1467370000 | O  | -0.2943990000 | 1.4081270000  | 0.0194460000  | O  | -0.2037220000 | 1.7694110000  | -0.0920590000 |
|                                                                      |       | O         | -1.7618600000 | -0.4025070000 | 0.1622060000  | O  | -1.5614110000 | -0.4528370000 | -0.0847430000 | O  | -1.5309610000 | -1.5025520000 | 0.2390640000  |
|                                                                      |       | H         | -2.5324340000 | 0.1287890000  | -0.0455010000 | H  | -1.3226490000 | 0.7993570000  | 0.0211120000  | H  | -0.2315160000 | 2.7251200000  | -0.0914410000 |
|                                                                      |       | H         | -2.0768820000 | -1.2810740000 | 0.3827100000  | H  | -2.1422990000 | -0.9096680000 | 0.5176320000  | H  | -2.2091340000 | -2.1553380000 | 0.4066830000  |
| MoO <sup>+</sup><br>A <sup>4</sup> $\Pi$<br>(2 <sup>4</sup> A)       | 1.656 | Mo        | 1.6793100000  | 0.9537550000  | 0.2014780000  | Mo | 0.5346230000  | -0.1679250000 | 0.0106550000  | Mo | 0.4655260000  | -0.3490150000 | -0.1436930000 |
|                                                                      |       | O         | 0.1067280000  | 0.4498760000  | -0.2185150000 | O  | -0.3378990000 | 1.3915380000  | 0.1098030000  | O  | -0.5241160000 | 1.3683820000  | -0.3629300000 |
|                                                                      |       | O         | -2.5350320000 | -0.3519090000 | -0.0932080000 | O  | -1.7141620000 | -0.4329280000 | -0.2200670000 | O  | 1.4438150000  | -2.0690490000 | 0.1486720000  |
|                                                                      |       | H         | -1.6232700000 | -0.0662730000 | -0.2509790000 | H  | -1.3378090000 | 0.6609040000  | -0.0452000000 | H  | -0.7829470000 | 1.8183410000  | 0.4328520000  |
|                                                                      |       | H         | -2.5726470000 | -0.4207300000 | 0.8522580000  | H  | -2.0260120000 | -0.7713060000 | 0.6123930000  | H  | 0.9098730000  | -2.8471610000 | 0.2578130000  |
| MoO <sup>2+</sup><br>X <sup>3</sup> $\Sigma^-$<br>(1 <sup>3</sup> A) | 1.568 | Mo        | 0.3273550000  | 0.1795210000  | 0.0345080000  | Mo | 0.3926340000  | -0.1997000000 | 0.0064530000  | Mo | -0.5684050000 | -0.0088340000 | 0.0298100000  |
|                                                                      |       | O         | 0.9658370000  | 1.6052930000  | -0.1134630000 | O  | -0.2647820000 | 1.3471240000  | -0.0338230000 | O  | -0.2693680000 | 1.7017890000  | -0.1455930000 |
|                                                                      |       | O         | -1.7308460000 | -0.3656170000 | 0.1492780000  | O  | -1.5234370000 | -0.3879510000 | 0.0393010000  | O  | -1.4610300000 | -1.4858100000 | 0.2904240000  |
|                                                                      |       | H         | -2.4707260000 | 0.2320420000  | -0.0352760000 | H  | -1.3644030000 | 0.9579790000  | 0.0169110000  | H  | -0.3184200000 | 2.6755860000  | -0.2073210000 |
|                                                                      |       | H         | -2.1272360000 | -1.2093410000 | 0.4124200000  | H  | -2.1212700000 | -1.0371700000 | 0.4387410000  | H  | -2.1322780000 | -2.1761370000 | 0.4559250000  |
| MoO <sup>2+</sup><br>$\alpha^1\Gamma$<br>(1 <sup>1</sup> A)          | 1.565 | Mo        | 0.3281160000  | 0.1581510000  | -0.3155230000 | Mo | 0.3086990000  | -0.1485390000 | -0.0068560000 | Mo | -0.5030710000 | -0.0048600000 | 0.0224790000  |
|                                                                      |       | O         | 0.6604460000  | 1.5045170000  | 0.4186710000  | O  | -0.2342210000 | 1.4279330000  | 0.0706410000  | O  | -0.2336470000 | 1.7069550000  | -0.1502190000 |
|                                                                      |       | O         | -1.6406570000 | -0.3638600000 | 0.0216390000  | O  | -1.5277740000 | -0.5678630000 | -0.1246520000 | O  | -1.4879120000 | -1.4165030000 | 0.2871940000  |
|                                                                      |       | H         | -2.4041880000 | -0.0424310000 | -0.4655990000 | H  | -1.3084360000 | 0.8794600000  | -0.0355490000 | H  | -0.3119810000 | 2.6794680000  | -0.2104110000 |
|                                                                      |       | H         | -1.9806920000 | -0.8394920000 | 0.7848170000  | H  | -2.1195260000 | -0.9107080000 | 0.5640000000  | H  | -2.2119920000 | -2.0520740000 | 0.4524200000  |
| MoO <sup>2+</sup><br>$\alpha^1\Gamma$<br>(2 <sup>1</sup> A)          | 1.565 | Mo        | 0.3392870000  | 0.1437440000  | -0.0458690000 | Mo | 0.3906310000  | -0.1969620000 | 0.0135680000  | Mo | -0.5001040000 | -0.0356650000 | 0.0201150000  |
|                                                                      |       | O         | 0.9728660000  | 1.5663290000  | -0.2408590000 | O  | -0.2608120000 | 1.3364150000  | -0.0601460000 | O  | -0.2707750000 | 1.6827650000  | -0.1446530000 |
|                                                                      |       | O         | -1.6995800000 | -0.3894890000 | 0.2361970000  | O  | -1.5306610000 | -0.3886510000 | 0.0732400000  | O  | -1.4495120000 | -1.4708460000 | 0.2877730000  |
|                                                                      |       | H         | -2.4347620000 | 0.2413140000  | 0.2649810000  | H  | -1.3532470000 | 0.9997600000  | 0.0240950000  | H  | -0.3714960000 | 2.6537480000  | -0.1961960000 |
|                                                                      |       | H         | -2.0925040000 | -1.2658890000 | 0.3647920000  | H  | -2.1271690000 | -1.0702790000 | 0.4168270000  | H  | -2.1576130000 | -2.1234060000 | 0.4562060000  |

|                                                                         |       |                                                                                                                                                                                                                                    |                                                                                                                                                                                                                                     |                                                                                                                                                                                                                                   |
|-------------------------------------------------------------------------|-------|------------------------------------------------------------------------------------------------------------------------------------------------------------------------------------------------------------------------------------|-------------------------------------------------------------------------------------------------------------------------------------------------------------------------------------------------------------------------------------|-----------------------------------------------------------------------------------------------------------------------------------------------------------------------------------------------------------------------------------|
| MoO <sup>-</sup><br>X <sup>4</sup> Π<br>(1 <sup>4</sup> A)              | 1.700 | Mo 1.7268250000 0.9725020000 0.0127210000<br>O 0.1060700000 0.4444950000 0.0437250000<br>O -2.5254740000 -0.3451810000 -0.1464110000<br>H -1.6019300000 -0.0585790000 -0.2072990000<br>H -2.6504020000 -0.4485180000 0.7883000000  | Mo 0.5567710000 -0.1762400000 0.0152230000<br>O -0.3497050000 1.3937810000 0.0756320000<br>O -1.7096660000 -0.4363090000 -0.1976700000<br>H -1.3191730000 0.7128970000 -0.0198790000<br>H -2.0594850000 -0.8138460000 0.5942790000  | Mo 0.4665680000 -0.3493840000 -0.1235290000<br>O -0.2610930000 1.4834110000 -0.2417700000<br>O 1.3173990000 -2.1321930000 -0.1413160000<br>H -0.9730620000 1.6769180000 0.3581510000<br>H 0.9623390000 -2.7572540000 0.4811780000 |
| MoO <sup>-</sup><br>X <sup>4</sup> Π<br>(2 <sup>4</sup> A)              | 1.700 | Mo 1.6793100000 0.9537550000 0.2014780000<br>O 0.1067280000 0.4498760000 -0.2185150000<br>O -2.5350320000 -0.3519090000 -0.0932080000<br>H -1.6232700000 -0.0662730000 -0.2509790000<br>H -2.5726470000 -0.4207300000 0.8522580000 | Mo 0.5346230000 -0.1679250000 0.0106550000<br>O -0.3378990000 1.3915380000 0.1098030000<br>O -1.7141620000 -0.4329280000 -0.2200670000<br>H -1.3378090000 0.6609040000 -0.0452000000<br>H -2.0260120000 -0.7713060000 0.6123930000  | Mo 0.4655260000 -0.3490150000 -0.1436930000<br>O -0.5241160000 1.3683820000 -0.3629300000<br>O 1.4438150000 -2.0690490000 0.1486720000<br>H -0.7829470000 1.8183410000 0.4328520000<br>H 0.9098730000 -2.8471610000 0.2578130000  |
| MoO <sup>-</sup><br>1 <sup>6</sup> Σ <sup>+</sup><br>(1 <sup>6</sup> A) | 1.741 | Mo 1.7355940000 0.9770170000 -0.0025390000<br>O 0.0578670000 0.4283910000 0.0481860000<br>O -2.5055450000 -0.3377280000 -0.1535840000<br>H -1.5695600000 -0.0510690000 -0.1758310000<br>H -2.6632650000 -0.4518920000 0.7748040000 | Mo 0.7321230000 -0.1025130000 -0.0212440000<br>O -0.3479900000 1.3906220000 0.1190330000<br>O -1.7970430000 -0.4464940000 -0.2137910000<br>H -1.3256110000 0.5784080000 -0.0373870000<br>H -2.1427370000 -0.7397400000 0.6209730000 | Mo 0.3681950000 -0.3891720000 -0.0096800000<br>O -0.1754040000 1.6415530000 -0.0130220000<br>O 1.1413660000 -2.3271010000 -0.2665750000<br>H -1.0934200000 1.8470310000 0.1084680000<br>H 1.2714140000 -2.8508130000 0.5135230000 |
| MoO <sup>-</sup><br>1 <sup>2</sup> Δ<br>(1 <sup>2</sup> A)              | 1.646 | Mo 1.6191550000 0.7094130000 0.2756280000<br>O 0.0703510000 0.7885670000 -0.2889600000<br>O -2.5568740000 -0.2631620000 -0.0015540000<br>H -1.7225090000 0.1730780000 -0.1996020000<br>H -2.3187660000 -0.8631080000 0.6944460000  | Mo 0.5151890000 -0.1661450000 0.0044900000<br>O -0.3412960000 1.4020820000 0.1086610000<br>O -1.6847970000 -0.4486450000 -0.2121150000<br>H -1.3362710000 0.6619030000 -0.0453270000<br>H -2.0340830000 -0.7689120000 0.6118740000  | Mo 0.6771930000 -0.2415980000 -0.3252510000<br>O -0.2719000000 1.3351750000 0.0405480000<br>O 1.4382080000 -1.9802030000 -0.7008310000<br>H -1.0880320000 1.7546820000 0.1983880000<br>H 1.0105560000 -2.8208090000 -0.8076610000 |
| MoO <sup>-</sup><br>1 <sup>2</sup> Δ<br>(2 <sup>2</sup> A)              | 1.646 | Mo 1.6219660000 0.7126290000 0.2735090000<br>O 0.0714640000 0.7868370000 -0.2872780000<br>O -2.5574180000 -0.2622910000 -0.0022620000<br>H -1.7211870000 0.1718220000 -0.1975260000<br>H -2.3234680000 -0.8642080000 0.6935150000  | Mo 0.5024020000 -0.1779250000 0.0143440000<br>O -0.3222660000 1.4161780000 0.1085010000<br>O -1.6863400000 -0.4318030000 -0.2166540000<br>H -1.3675300000 0.6456240000 -0.0504820000<br>H -2.0075240000 -0.7717910000 0.6118750000  | Mo 0.6788570000 -0.2407820000 -0.3252060000<br>O -0.2725480000 1.3342910000 0.0405150000<br>O 1.4376960000 -1.9802020000 -0.7008970000<br>H -1.0881440000 1.7547760000 0.1983490000<br>H 1.0101620000 -2.8208360000 -0.8075660000 |
